# Supplementary material for: Influence of Mo doping on interfacial charge carrier dynamics in photoelectrochemical water oxidation on BiVO4
Source: Royal Society of Chemistry journal article supplement (doi:10.1039/d3se00061c), 2023-01-01
Supplement: d3se00061c1.pdf [file d3se00061c1.pdf]

## Supporting Information

### **Influence of Mo doping on interfacial charge carrier dynamics in photoelectrochemical water oxidation on BiVO<sub>4</sub>**

Xiaofeng Wu<sup>a</sup>, Freddy E. Oropeza<sup>b</sup>, Zheng Qi<sup>c</sup>, Marcus Einert<sup>a</sup>, Chuanmu Tian<sup>a</sup>, Clément Maheu<sup>a</sup>, Kangle Lv<sup>c</sup>, Jan P. Hofmann<sup>a</sup>

<sup>a</sup>Surface Science Laboratory, Department of Materials and Earth Sciences, Technical University of Darmstadt, Otto-Berndt-Strasse 3, 64287 Darmstadt, Germany

<sup>b</sup>Photoactivated Processes Unit, IMDEA Energy Institute, Parque Tecnológico de Móstoles, Avda. Ramón de la Sagra 3, 28935 Móstoles, Madrid, Spain

<sup>c</sup>Laboratory of Catalysis and Materials Science of the State Ethnic Affairs Commission & Ministry of Education, College of Resources and Environment, South-Central Minzu University, Wuhan 430074, China

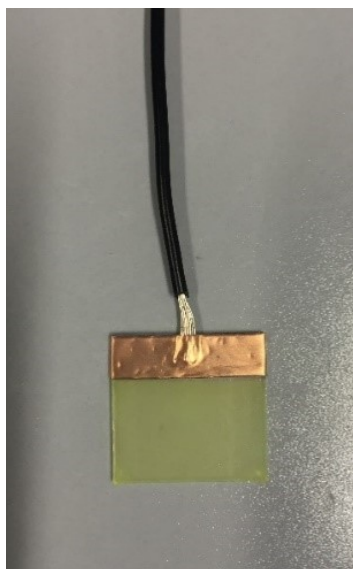

**Figure S1** Contacting of BVO photoelectrode.

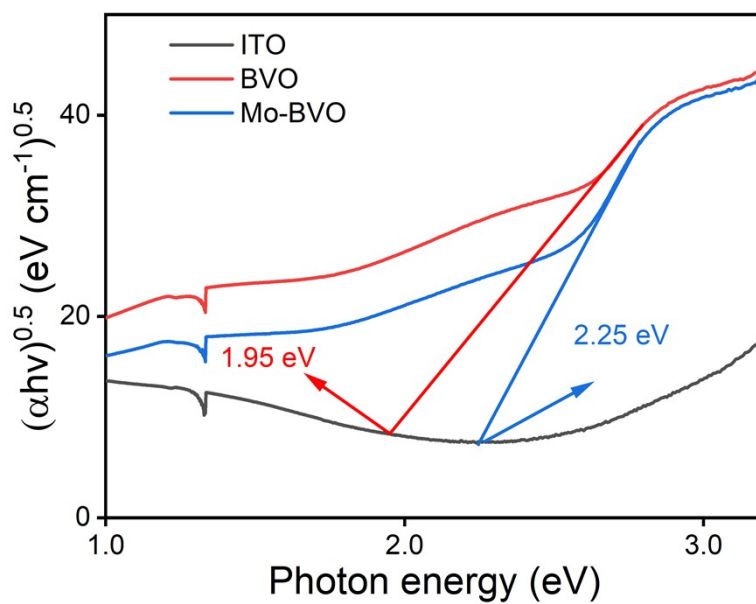

**Figure S2** Tauc plots of as-prepared  $\text{BiVO}_4$  film samples, assuming indirect optical absorption.

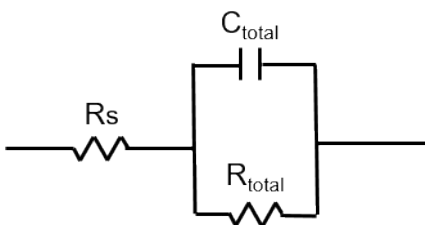

**Figure S3** Randles model for fitting electrochemical impedance spectra of as-prepared samples.

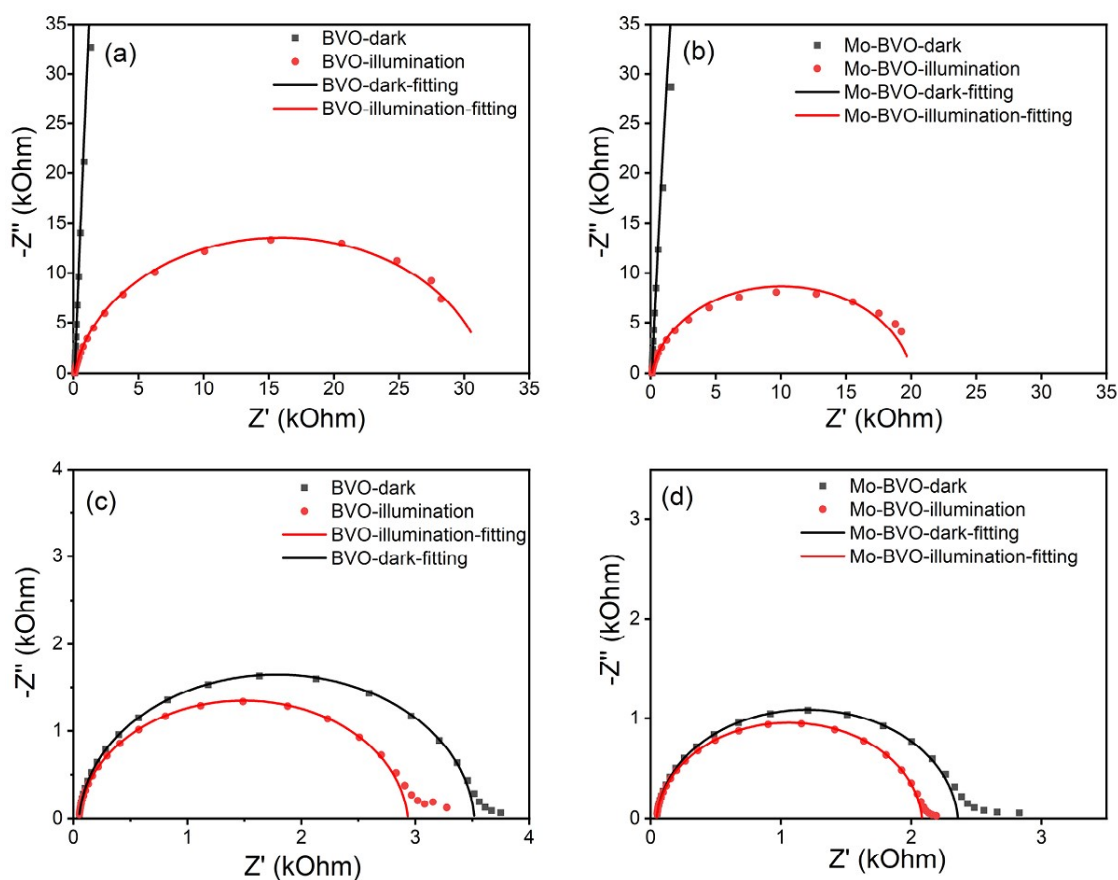

**Figure S4** EIS fitting results of as-prepared samples, measured at 1.2 V vs. RHE in 0.1 M phosphate buffer solution ((a) and (b)) and 0.5 M  $\text{Na}_2\text{SO}_3$  solution ((c) and (d)).

**Table S1** Element parameters of Randles equivalent circuit, obtained from EIS data fitting, measured in 0.1 M phosphate buffer solution

| Sample | Condition    | Rs ( $\Omega$ ) | CPE                           |          | R <sub>total</sub> =R <sub>bulk</sub> +R <sub>ct</sub><br>(M $\Omega$ ) | Error(%) |
|--------|--------------|-----------------|-------------------------------|----------|-------------------------------------------------------------------------|----------|
|        |              |                 | C <sub>total</sub> ( $\mu$ F) | $\alpha$ |                                                                         |          |
| BVO    | Dark         | 101             | 3.03                          | 0.982    | 12.6                                                                    | 1.3      |
|        | Illumination | 92.9            | 2.85                          | 0.904    | 31.6 $\times 10^{-3}$                                                   | 6.9      |
| Mo-BVO | Dark         | 99.7            | 3.40                          | 0.979    | 5.51                                                                    | 2.7      |
|        | Illumination | 91.9            | 3.06                          | 0.911    | 19.9 $\times 10^{-3}$                                                   | 14.1     |

**Table S2** Element parameters of Randle equivalent circuit, obtained from EIS data fitting, measured in 0.5 M Na<sub>2</sub>SO<sub>3</sub> solution

| Sample | Condition    | R <sub>s</sub> (Ω) | CPE                     |       | R <sub>total</sub> =R <sub>bulk</sub> +R <sub>ct</sub><br>(KΩ) | Error(%) |
|--------|--------------|--------------------|-------------------------|-------|----------------------------------------------------------------|----------|
|        |              |                    | C <sub>total</sub> (μF) | α     |                                                                |          |
| BVO    | Dark         | 49.6               | 3.17                    | 0.967 | 3.47                                                           | 1.0      |
|        | Illumination | 47.2               | 2.30                    | 0.956 | 2.89                                                           | 2.0      |
| Mo-BVO | Dark         | 45.4               | 3.14                    | 0.960 | 2.31                                                           | 1.2      |
|        | Illumination | 44.7               | 3.21                    | 0.958 | 2.06                                                           | 2.0      |

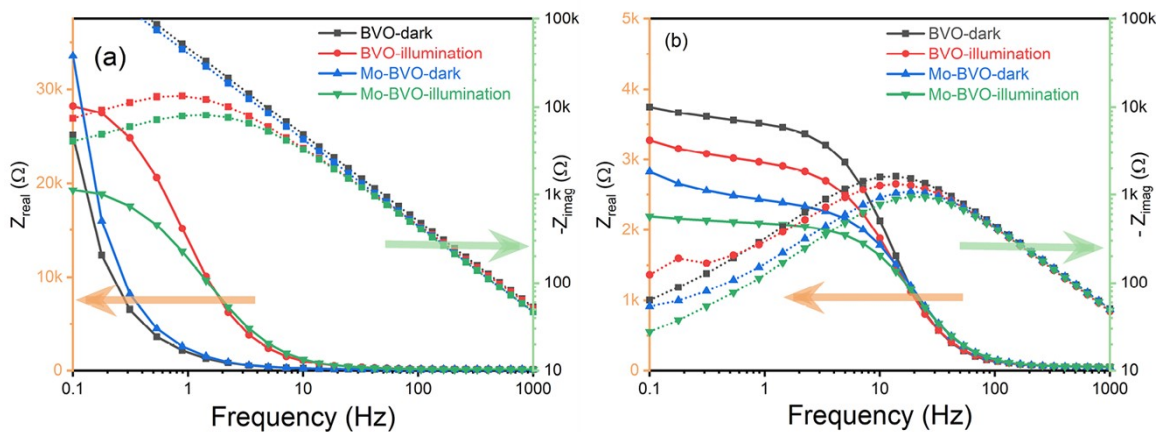

**Figure S5** Resistance vs. frequency plots of as-prepared BVO samples, measured at 1.2 V vs. RHE in 0.1 M phosphate buffer solution (a) and 0.5 M  $\text{Na}_2\text{SO}_3$  solution (b). The real resistance at 1 kHz is independent of frequency and the slope of imaginary resistance at 1 kHz is close to 1, which indicates 1 kHz of frequency is suitable for Mott-Schottky measurement.

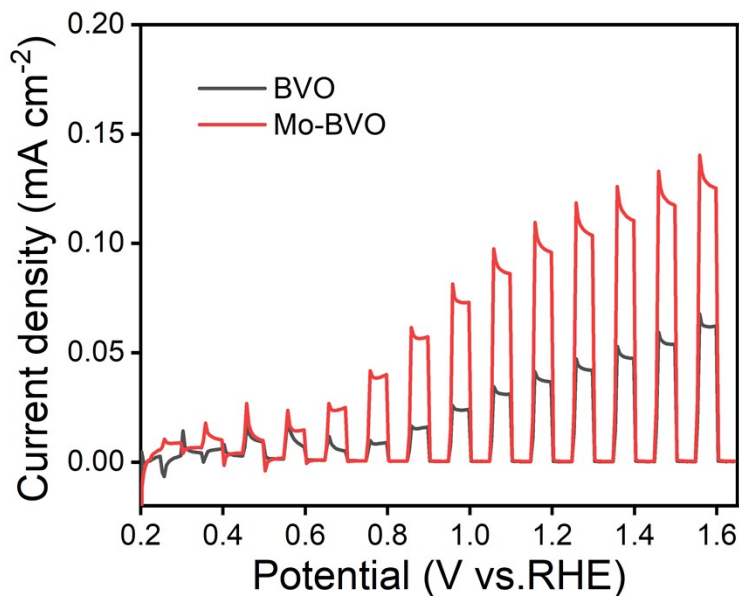

**Figure S6** Chopped light voltammetry (CLV) curves of BVO and Mo-BVO samples, measured in 0.1 M phosphate buffer solution. The scan rate is  $50 \text{ mV s}^{-1}$ .

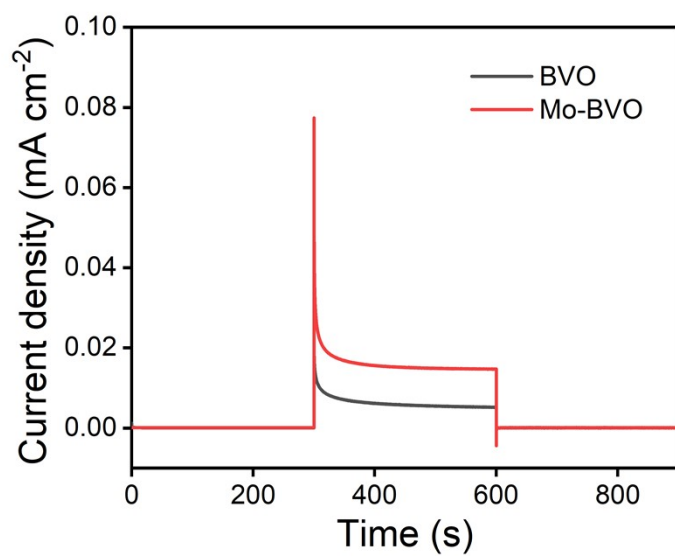

**Figure S7** Chopped photocurrent curves of BVO and Mo-BVO samples, measured at 1.2 V<sub>RHE</sub> in 0.1 M phosphate buffer solution.
